# Supplementary material for: Correlations Between the Metabolome and the Endophytic Fungal Metagenome Suggests Importance of Various Metabolite Classes in Community Assembly in Horseradish (Armoracia rusticana, Brassicaceae) Roots
Source: Frontiers journal article supplement (doi:10.3389/fpls.2022.921008), 2022-06-17
Supplement: Image_3.PDF [file Image_3.PDF]

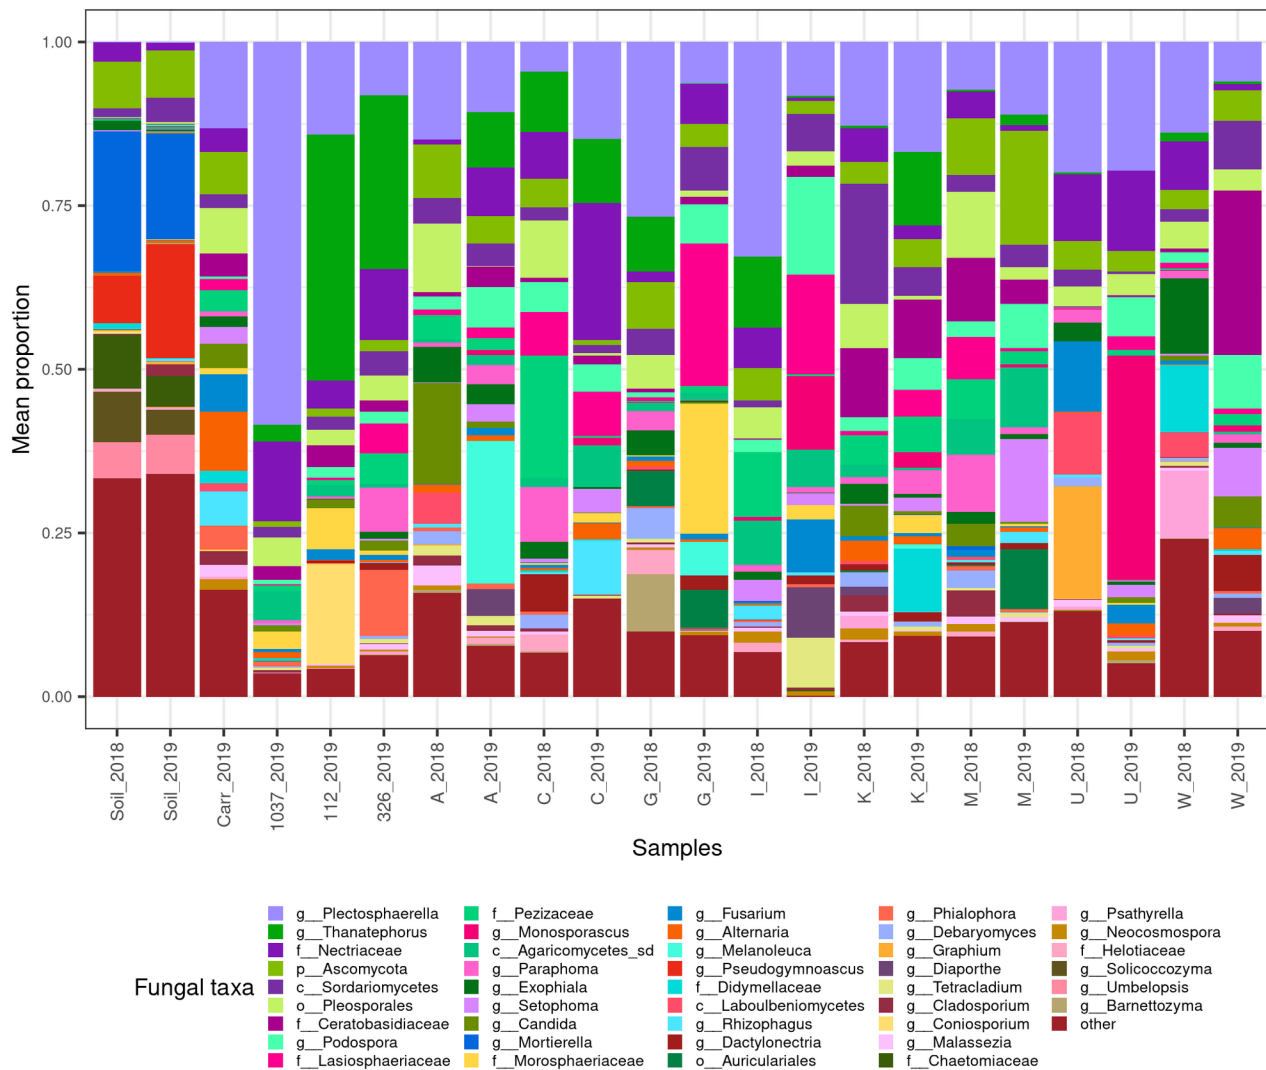

**Figure S3.** Bar plot showing relative mean proportion of fungal taxa in the endophytic fungal community in all sample groups ( $n = 4$  per group). The top 10% of filtered, fungal reads are included and aggregated at genus level (if not available, the lowest possible taxonomic level). Fungal taxa prefixes follow UNITE notation (“c\_”, class; “f\_”, family; “g\_”, genus; “o\_”, order; “p\_”, phylum). “Other” means a pool of ASVs from all other taxa. Sample codes: year\_sample, where sample type is either “soil”, “carr” (soil or carrot both from site 1), 1037 or 326 or 112 (site 2 horseradish samples from three soil types) or A-W (accession codes from site 1).
