# Supplementary material for: Correlations Between the Metabolome and the Endophytic Fungal Metagenome Suggests Importance of Various Metabolite Classes in Community Assembly in Horseradish (Armoracia rusticana, Brassicaceae) Roots
Source: Frontiers journal article supplement (doi:10.3389/fpls.2022.921008), 2022-06-17
Supplement: Image_4.PDF [file Image_4.PDF]

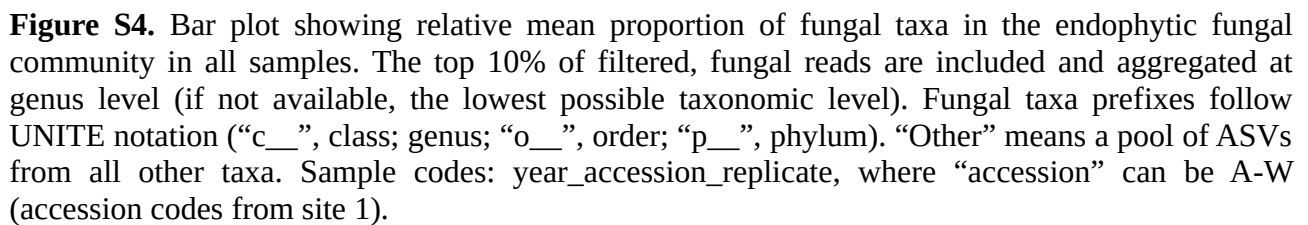

**Figure S4.** Bar plot showing relative mean proportion of fungal taxa in the endophytic fungal community in all samples. The top 10% of filtered, fungal reads are included and aggregated at genus level (if not available, the lowest possible taxonomic level). Fungal taxa prefixes follow UNITE notation (“c\_”, class; genus; “o\_”, order; “p\_”, phylum). “Other” means a pool of ASVs from all other taxa. Sample codes: year\_accession\_replicate, where “accession” can be A-W (accession codes from site 1).
