# Supplementary material for: Correlations Between the Metabolome and the Endophytic Fungal Metagenome Suggests Importance of Various Metabolite Classes in Community Assembly in Horseradish (Armoracia rusticana, Brassicaceae) Roots
Source: Front Plant Sci. 2022 Jun 17;13:921008. doi: 10.3389/fpls.2022.921008 (PMC9247618; doi:10.3389/fpls.2022.921008)
Supplement: Supplementary file 15 [file Table_10.XLSX]

## Sheet: TS10_order_level_aggregate_data
Table S10. Relative mean proportion of fungal taxa in the endophytic fungal community in all sample groups (n = 4 per group), aggregated to order level (or the highest resolution level with acceptable identification confidence). All fungal taxa formed from filtered, fungal reads are included. Fungal taxa prefixes follow UNITE notation (“c__”, class; “o__”, order; “p__”, phylum). Sample codes: yea…
Sample	c__Agaricomycetes	c__Cystobasidiomycetes	c__Dothideomycetes	c__Endogonomycetes	c__Eurotiomycetes	c__GS14	c__GS18	c__GS37	c__Laboulbeniomycetes	c__Leotiomycetes	c__Lobulomycetes	c__Microbotryomycetes	c__Mortierellomycetes	c__Sordariomycetes	o__Agaricales	o__Auriculariales	o__Basidiobolales	o__Boletales	o__Boliniales	o__Branch06	o__Calcarisporiellales	o__Caliciales	o__Cantharellales	o__Capnodiales	o__Chaetosphaeriales	o__Chaetothyriales	o__Chytridiales	o__Coniochaetales	o__Conioscyphales	o__Corticiales	o__Cystobasidiales	o__Cystobasidiomycetes_ord_Incertae_sedis	o__Cystofilobasidiales	o__Diaporthales	o__Dothideales	o__Dothideomycetes_ord_Incertae_sedis	o__Entorrhizales	o__Entylomatales	o__Erythrobasidiales	o__Eurotiales	o__Filobasidiales	o__Geastrales	o__Glomerales	o__Glomerellales	o__Gomphales	o__GS05	o__GS08	o__GS16	o__GS27
Soil_2018	0.006	0	0	0	0	0.0002	0.0001	0	0	0.0002	0.0002	0.0008	0	0.0138	0.0172	0.0004	0	0.0002	0.0002	0.0002	0	0	0.0027	0.0028	0.0242	0.029	0.0001	0.0099	0.0007	0	0	0.0004	0.006	0.0001	0.0017	0.0002	0.0003	0	0.0002	0.0159	0.0822	0.0001	0.0022	0.0064	0	0	0	0.0016	0
Soil_2019	0.006	0	0	0	0	0	0	0	0	0	0	0.0001	0	0.0367	0.0148	0.0017	0	0	0.0001	0.0004	0	0	0.0033	0.0195	0	0.0095	0	0.0041	0.0044	0	0	0.0001	0.0127	0	0.0004	0	0	0.0002	0	0.0423	0.0703	0	0.0043	0.0041	0	0	0	0.0017	0
Carr_2019	0	0	0	0	0	0	0	0	0.0124	0	0	0	0	0.0208	0.0194	0.0021	0	0	0.0356	0	0	0	0.0349	0.0226	0	0.053	0	0	0	0	0	0	0	0	0	0	0	0	0	0.0174	0.0116	0	0.052	0.1319	0	0	0	0	0
1037_2019	0.0264	0	0	0	0	0	0	0	0	0	0	0	0	0.0164	0.0046	0.0002	0	0	0.0047	0	0	0	0.0471	0.0037	0	0.0098	0	0	0	0	0	0	0.0101	0	0.0003	0	0	0	0	0	0	0	0	0.5846	0	0	0	0.0008	0
112_2019	0.0108	0	0	0	0	0	0	0	0	0	0	0	0	0.0203	0.0006	0.0006	0	0	0	0	0	0	0.4082	0.0004	0	0.1532	0	0	0	0	0	0	0.0005	0	0	0	0	0	0	0.0024	0.0002	0	0	0.1417	0	0	0	0	0
326_2019	0.0034	0	0	0	0	0	0	0	0.0004	0	0	0	0	0.0372	0.008	0.001	0	0	0.0042	0	0	0	0.2829	0.0033	0	0.1105	0	0	0	0	0	0	0.0057	0	0.0001	0	0	0	0	0.0039	0	0	0.0085	0.0811	0	0	0	0.0002	0
A_2018	0.0029	0	0	0	0	0	0	0	0.0481	0	0	0	0	0.0391	0.0284	0.0092	0	0	0.0153	0	0	0	0.007	0.0177	0	0.0602	0	0	0	0	0	0	0.0103	0	0.002	0	0	0	0	0.0061	0	0	0.0091	0.1485	0	0	0	0.0045	0
A_2019	0.0126	0	0	0	0.0003	0	0	0	0	0	0	0	0	0.0342	0.2323	0	0	0	0	0	0	0	0.1161	0.0085	0	0.039	0	0	0	0	0	0	0	0.041	0	0	0	0	0	0.0125	0	0	0.0002	0.107	0	0	0	0	0
C_2018	0.0065	0	0	0	0	0	0	0	0	0	0	0	0	0.0202	0	0	0	0	0	0	0	0	0.0984	0.0083	0	0.0304	0	0	0	0	0	0	0	0	0.0026	0	0	0	0	0.004	0	0	0.0036	0.0473	0	0	0	0	0
C_2019	0.0326	0	0	0	0	0	0	0	0	0	0	0	0	0.0124	0.0003	0.0041	0	0	0.0086	0.0019	0	0	0.1115	0	0	0.0037	0	0.0024	0	0	0	0.0003	0.0004	0.0004	0	0	0	0	0	0.0004	0	0	0.0824	0.1498	0	0	0	0	0
G_2018	0.0058	0	0	0	0	0	0	0	0.004	0	0	0	0	0.0406	0	0.0621	0	0	0.0019	0	0	0	0.0897	0.0037	0	0.0421	0	0	0	0	0	0.0002	0	0	0	0	0	0	0	0.0062	0.0006	0	0	0.2666	0	0	0	0.001	0
G_2019	0.0165	0	0	0	0	0	0	0	0.0005	0	0	0	0	0.0659	0.0533	0.0584	0	0.0001	0.0005	0	0	0	0.0126	0.0016	0	0.0049	0	0	0	0	0	0	0	0.0019	0.0001	0	0	0	0.0003	0.0013	0	0	0.0009	0.0637	0	0	0	0	0
I_2018	0.0357	0	0	0	0	0	0	0	0	0	0	0	0	0.0109	0.0031	0	0	0	0	0	0	0	0.1097	0.0053	0	0.0165	0	0.0003	0	0	0	0.0035	0	0.0001	0.0027	0	0	0	0	0.0155	0.0008	0	0.0311	0.3277	0	0	0	0.0009	0
I_2019	0.0364	0	0	0	0	0	0	0	0	0	0	0	0	0.0569	0.0005	0	0	0	0	0	0	0	0.0196	0.004	0	0.0059	0	0.0002	0	0	0	0	0	0.0767	0.0001	0	0	0	0	0.0004	0	0	0.0059	0.0827	0	0	0	0.0002	0
K_2018	0.0095	0	0	0	0	0	0	0	0.005	0	0	0	0	0.1828	0.0193	0.014	0	0	0.0014	0	0	0	0.1087	0.0241	0.0006	0.0312	0	0	0	0	0	0.0006	0.0031	0.013	0.0041	0	0	0	0	0.0083	0	0	0.0012	0.1283	0	0	0	0.0001	0
K_2019	0.0047	0	0	0	0	0	0	0	0	0	0	0	0	0.0438	0.0375	0.0006	0	0	0	0.0009	0	0	0.2019	0	0	0.0111	0	0.0002	0	0	0	0	0.0005	0.0002	0.0051	0	0	0	0	0.0007	0	0	0.0009	0.1706	0	0	0	0	0
M_2018	0.0273	0	0	0	0.0002	0	0	0	0.0049	0	0	0	0	0.0263	0.0055	0.0028	0	0	0	0	0	0	0.1001	0.0394	0	0.0275	0	0	0	0	0	0	0.0065	0	0.0005	0	0	0	0	0.0056	0	0	0.0091	0.0736	0	0	0	0.0003	0
M_2019	0.1043	0	0	0	0.0002	0	0	0	0	0	0	0	0	0.0344	0.0012	0.0944	0	0	0.0049	0.0218	0	0	0.0538	0.0003	0.0012	0.0139	0	0.0005	0	0	0	0	0	0	0.0021	0	0	0	0	0.0048	0	0	0.0168	0.1107	0	0	0	0	0
U_2018	0.0001	0	0	0	0	0	0	0	0.0941	0	0	0	0	0.026	0.0078	0	0	0	0	0	0	0	0.0043	0.0018	0	0.0293	0	0	0	0	0	0	0.0001	0.0004	0.0003	0	0	0	0	0.0079	0.0074	0	0.0048	0.2067	0	0	0	0	0
U_2019	0.0002	0	0	0	0	0	0	0	0.0047	0	0	0	0	0.0038	0.0017	0.0019	0	0	0.0055	0	0	0	0.0029	0	0	0.0058	0	0	0	0	0	0	0	0	0	0	0	0	0	0.0004	0	0	0.0023	0.1994	0	0	0	0	0
W_2018	0	0	0	0	0	0	0	0	0.0376	0.0003	0	0	0	0.0188	0.102	0	0	0	0	0	0	0	0.0199	0.0054	0.0015	0.1226	0	0	0	0	0	0.0007	0	0.0001	0.0034	0	0	0	0	0.009	0.0014	0	0	0.1382	0	0	0	0	0
W_2019	0.0031	0	0	0	0	0	0	0	0	0	0	0	0	0.0742	0.0084	0.0045	0	0	0.0162	0	0	0	0.2559	0.0062	0	0.0139	0	0	0	0	0	0	0.002	0.0237	0	0	0	0	0	0.0131	0	0	0.0061	0.0602	0	0	0	0.0054	0
[truncated: 159 more columns]
