# Supplementary material for: Correlations Between the Metabolome and the Endophytic Fungal Metagenome Suggests Importance of Various Metabolite Classes in Community Assembly in Horseradish (Armoracia rusticana, Brassicaceae) Roots
Source: Front Plant Sci. 2022 Jun 17;13:921008. doi: 10.3389/fpls.2022.921008 (PMC9247618; doi:10.3389/fpls.2022.921008)
Supplement: Supplementary file 16 [file Table_11.XLSX]

## Sheet: TS11_genus_level_aggregate_data
Table S11. Relative mean proportion of fungal taxa in the endophytic fungal community in all sample groups (n = 4 per group), aggregated to genus level (or the highest resolution level with acceptable identification confidence). All fungal taxa formed from filtered, fungal reads are included. Fungal taxa prefixes follow UNITE notation (“c__”, class; “f__”, family; “g__”, genus; “o__”, order; “p__…
Sample	c__Agaricomycetes	c__Cystobasidiomycetes	c__Dothideomycetes	c__Endogonomycetes	c__Eurotiomycetes	c__GS14	c__GS18	c__GS37	c__Laboulbeniomycetes	c__Leotiomycetes	c__Lobulomycetes	c__Microbotryomycetes	c__Mortierellomycetes	c__Sordariomycetes	f__Aspergillaceae	f__Aureobasidiaceae	f__Bartaliniaceae	f__Bionectriaceae	f__Boliniales_fam_Incertae_sedis	f__Ceratobasidiaceae	f__Chaetomiaceae	f__Chaetosphaeriaceae	f__Chytridiaceae	f__Clavicipitaceae	f__Coniochaetaceae	f__Cordycipitaceae	f__Diatrypaceae	f__Didymellaceae	f__Didymosphaeriaceae	f__Dipodascaceae	f__Dothideaceae	f__Ganodermataceae	f__Glomeraceae	f__Gomphaceae	f__Halosphaeriaceae	f__Helotiaceae	f__Helotiales_fam_Incertae_sedis	f__Herpotrichiellaceae	f__Hyaloriaceae	f__Hyaloscyphaceae	f__Hydnodontaceae	f__Hypocreaceae	f__Hypocreales_fam_Incertae_sedis	f__Lasiosphaeriaceae	f__Lentitheciaceae	f__Leptosphaeriaceae	f__Lycoperdaceae	f__Melanommataceae	f__Microascaceae
Soil_2018	0.006	0	0	0	0	0.0002	0.0001	0	0	0.0002	0.0002	0.0008	0	0.0138	0	0	0	0.0102	0.0002	0.0003	0.0818	0.0005	0.0001	0	0.0046	0.0001	0	0.0087	0	0	0	0.0001	0.0005	0	0	0.0043	0	0.0041	0	0	0.0002	0.0001	0	0.0005	0	0	0.0002	0	0.0092
Soil_2019	0.006	0	0	0	0	0	0	0	0	0	0	0.0001	0	0.0367	0.0027	0	0	0.0026	0.0001	0.0004	0.0466	0	0	0.0002	0.0005	0	0	0.0011	0	0	0.0004	0	0.0002	0	0.0045	0.0043	0	0	0	0	0	0	0.0001	0.0005	0	0	0.0004	0.0052	0.0048
Carr_2019	0	0	0	0	0	0	0	0	0.0124	0	0	0	0	0.0208	0	0	0	0	0.0356	0.0349	0	0	0	0	0	0	0	0.0194	0	0	0	0	0	0	0	0	0	0	0	0	0	0	0	0.0171	0	0.0033	0	0	0
1037_2019	0.0264	0	0	0	0	0	0	0	0	0	0	0	0	0.0164	0	0	0	0	0.0047	0.0209	0	0	0	0.001	0	0	0	0.0033	0	0	0	0	0	0	0	0	0	0	0	0	0	0	0	0.0021	0	0	0	0	0
112_2019	0.0108	0	0	0	0	0	0	0	0	0	0	0	0	0.0203	0	0	0	0.0002	0	0.0328	0	0	0	0	0	0	0	0.0004	0	0	0	0	0	0	0	0.0006	0.0004	0	0	0	0	0	0	0.0036	0	0	0	0	0
326_2019	0.0034	0	0	0	0	0	0	0	0.0004	0	0	0	0	0.0372	0	0	0	0.0004	0.0042	0.0171	0	0	0	0	0	0	0	0	0	0.0006	0	0	0.007	0	0	0.0053	0.0026	0	0.0003	0	0	0	0	0.0456	0	0.0002	0	0	0
A_2018	0.0029	0	0	0	0	0	0	0	0.0481	0	0	0	0	0.0391	0	0	0	0	0.0153	0.007	0	0	0	0	0	0	0	0	0	0.0023	0	0	0.0034	0	0	0	0.0098	0	0	0	0	0	0	0.0081	0	0	0	0	0
A_2019	0.0126	0	0	0	0.0003	0	0	0	0	0	0	0	0	0.0342	0	0	0	0.0007	0	0.0313	0	0	0	0	0	0	0	0.0003	0	0	0	0	0.0002	0	0	0.01	0	0	0	0	0	0	0	0.0163	0	0.0001	0	0	0
C_2018	0.0065	0	0	0	0	0	0	0	0	0	0	0	0	0.0202	0	0	0	0.001	0	0.0062	0	0	0	0	0	0	0	0.0025	0	0.0007	0	0	0	0	0	0.0249	0	0	0	0	0	0	0	0.0668	0.0016	0	0	0.0033	0
C_2019	0.0326	0	0	0	0	0	0	0	0	0	0	0	0	0.0124	0	0	0	0	0.0086	0.014	0	0	0	0	0.0006	0	0	0.0022	0	0	0	0	0	0	0	0	0	0	0	0	0	0	0	0.0679	0	0.0002	0	0.0009	0
G_2018	0.0058	0	0	0	0	0	0	0	0.004	0	0	0	0	0.0406	0.0004	0	0	0.0019	0.0019	0.0052	0	0	0	0	0	0	0	0	0	0.0011	0	0	0	0	0	0.0375	0	0	0.0007	0	0	0	0	0.0057	0	0	0	0.0008	0
G_2019	0.0165	0	0	0	0	0	0	0	0.0005	0	0	0	0	0.0659	0	0	0	0.0007	0.0005	0.0119	0	0	0	0	0	0	0	0	0	0	0	0	0	0	0	0	0	0	0	0	0	0	0	0.218	0	0	0	0	0
I_2018	0.0357	0	0	0	0	0	0	0	0	0	0	0	0	0.0109	0	0	0	0.0034	0	0.0015	0	0	0	0	0.0003	0	0	0.0006	0	0.0007	0	0	0.0102	0	0	0.0141	0	0	0	0	0	0	0	0.0003	0	0	0	0	0
I_2019	0.0364	0	0	0	0	0	0	0	0	0	0	0	0	0.0569	0	0	0	0.0001	0	0.017	0.0021	0	0	0	0.0002	0	0	0	0	0	0	0	0.0015	0	0	0	0	0	0	0	0	0	0	0.1522	0	0	0	0	0
K_2018	0.0095	0	0	0	0	0	0	0	0.005	0	0	0	0	0.1828	0	0	0	0	0.0014	0.1052	0	0	0	0	0	0	0	0	0	0	0	0	0.0012	0	0	0.0038	0.0012	0	0	0	0	0	0	0.0072	0	0	0	0	0.0006
K_2019	0.0047	0	0	0	0	0	0	0	0	0	0	0	0	0.0438	0	0.0001	0	0	0	0.0894	0	0	0	0	0.0002	0	0	0.0956	0	0	0	0	0	0	0	0	0.0002	0	0	0	0	0	0	0.0408	0	0	0	0.0001	0
M_2018	0.0273	0	0	0	0.0002	0	0	0	0.0049	0	0	0	0	0.0263	0	0	0	0	0	0.0971	0	0	0	0	0	0	0	0	0	0.0001	0	0	0.0054	0	0	0.0069	0	0	0	0	0	0	0	0.064	0	0	0	0	0
M_2019	0.1043	0	0	0	0.0002	0	0	0	0	0	0	0	0	0.0344	0	0	0	0.0004	0.0049	0.0371	0	0	0	0	0	0	0	0	0	0	0	0	0	0	0	0	0	0	0	0	0	0	0	0.0051	0	0	0	0.0206	0
U_2018	0.0001	0	0	0	0	0	0	0	0.0941	0	0	0	0	0.026	0	0	0	0	0	0.0015	0	0	0	0	0	0	0	0	0	0.0012	0	0	0	0	0	0	0.0003	0	0	0	0	0	0	0.0017	0	0	0	0	0
U_2019	0.0002	0	0	0	0	0	0	0	0.0047	0	0	0	0	0.0038	0	0	0	0	0.0055	0.0027	0	0	0	0	0	0.0001	0	0	0	0	0	0	0	0	0	0	0	0	0	0	0	0	0	0.0204	0	0	0	0	0
W_2018	0	0	0	0	0	0	0	0	0.0376	0.0003	0	0	0	0.0188	0	0	0	0.0014	0	0.0058	0	0	0	0	0	0	0	0.1027	0	0.0002	0	0	0	0	0	0.0018	0.0109	0	0	0	0	0	0	0.0093	0	0	0	0	0
W_2019	0.0031	0	0	0	0	0	0	0	0	0	0	0	0	0.0742	0	0	0	0	0.0162	0.2514	0	0	0	0	0	0	0.0023	0.0027	0	0	0	0	0	0	0	0.0064	0	0	0	0	0	0	0	0.0084	0	0	0	0	0
[truncated: 821 more columns]
